# Supplementary material for: Dietary Leucine Supplement Ameliorates Hepatic Steatosis and Diabetic Nephropathy in db/db Mice
Source: PubMed Central journal article supplement (PMC6073714; doi:10.3390/ijms19071921), 2018-06-30
Supplement: ijms-19-01921-s001.pdf [file ijms-19-01921-s001.pdf]

## Supplement 1

Table S1. Forward and reverse primers used for quantitative real-time reverse transcriptase PCR

| Gene        | Type    | Sequences (5' → 3')     |
|-------------|---------|-------------------------|
| ACC1        | Forward | TGACAGACTGATCGCAGAGAAAG |
|             | Reverse | TGGAGAGCCCCACACACA      |
| FAS         | Forward | GCTGCGGAAACTTCAGGAAAT   |
|             | Reverse | AGAGACGTGTCACTCCTGGACTT |
| Fibronectin | Forward | TGTGACCAGCAACACGGTG     |
|             | Reverse | ACAACAGGAGAGTAGGGCGC    |
| Collagen I  | Forward | AAGGGGTCTTCCTGGTGAAT    |
|             | Reverse | GGGGTACCACGTTCTCCTC     |
| Collagen IV | Forward | CTCTGGGGACAACATCCG      |
|             | Reverse | TCTTCTCATGCACACTTGGC    |
| ULK1        |         | Mm00437238_m1           |
| Becl1       |         | Mm01265461_m1           |
| VPs34       |         | Mm00619489_m1           |
| ATg5        |         | Mm01187303_m1           |
| ATg12       |         | Mm00503201_m1           |
| GAPDH       |         | Mm99999915_g1           |
| 18S rRNA    |         | Mm03928990_g1           |
